# Supplementary material for: Aeromonas hydrophila, an Emerging Causative Agent of Freshwater-Farmed Whiteleg shrimp Litopenaeus vannamei
Source: PubMed Central journal article supplement (PMC6843590; doi:10.3390/microorganisms7100450), 2019-10-14
Supplement: microorganisms-07-00450-s001.pdf [file microorganisms-07-00450-s001.pdf]

# *Aeromonas hydrophila*, an Emerging Causative Agent of Freshwater-farmed Whiteleg shrimp *Litopenaeus vannamei*

Huihua Zhou<sup>1</sup>, Chunlei Gai<sup>2</sup>, Guifang Ye<sup>1</sup>, Jian An<sup>3</sup>, Kai Liu<sup>4</sup>, La Xu<sup>2</sup> and Haipeng Cao<sup>1,\*</sup>

<sup>1</sup> National Pathogen Collection Center for Aquatic Animals, Shanghai Collaborative Innovation for Aquatic Animal Genetics and Breeding, Shanghai Engineering Research Center of Aquaculture, Shanghai Ocean University, Shanghai 201306, P.R. China.

<sup>2</sup> Marine Biology Institute of Shandong, Qingdao Shandong 266104, P.R. China.

<sup>3</sup> Lianyungang Marine and Fisheries Development Promotion Center, Lianyungang Jiangsu 222000, P.R. China.

<sup>4</sup> Institute of Fishery Science, Hangzhou Academy of Agricultural Sciences, Hangzhou Zhejiang 310024, P.R. China.

The first two authors contributed equally to this work.

\* Correspondence: e-mail: hpcao@shou.edu.cn; Tel: +862161900453; Fax: +862161900452.

**Table S1.** Susceptibility of isolate WS05 to veterinary antibiotics.

| Antibiotics    | Content (µg/disc) | Inhibition zone diameter (mm) |
|----------------|-------------------|-------------------------------|
| Amoxicillin    | 10                | 20.3±0.5 <sup>S</sup>         |
| Cotrimoxazole  | 23.75/1.25        | 23.3±0.9 <sup>S</sup>         |
| Cefotaxime     | 30                | 46.7±0.5 <sup>S</sup>         |
| Doxycycline*   | 30                | 23.7±0.5 <sup>S</sup>         |
| Enrofloxacin*  | 5                 | 34.3±0.5 <sup>S</sup>         |
| Florfenicol*   | 30                | 35.0±0.8 <sup>S</sup>         |
| Gentamicin     | 10                | 28.7±0.5 <sup>S</sup>         |
| Kanamycin      | 30                | 25.3±0.5 <sup>S</sup>         |
| Nalidixic acid | 30                | 34.3±0.5 <sup>S</sup>         |
| Neomycin*      | 30                | 23.7±0.5 <sup>S</sup>         |
| Netilmicin     | 30                | 28.3±0.5 <sup>S</sup>         |
| Novobiocin     | 30                | 9.0±0.8 <sup>R</sup>          |
| Oxacillin      | 1                 | 18.3±0.5 <sup>S</sup>         |
| Polymyxin B    | 30                | 15.3±0.5 <sup>S</sup>         |
| Rifampicin     | 5                 | 11.0±0 <sup>R</sup>           |
| Streptomycin   | 10                | 24.3±0.5 <sup>S</sup>         |
| Tetracycline*  | 30                | 26.3±0.5 <sup>S</sup>         |
| Tobramycin     | 10                | 27.3±0.5 <sup>S</sup>         |

Data are presented as the mean ± standard deviation of three independent experiments. <sup>S</sup>Sensitive; <sup>R</sup>Resistant.\*Veterinary antibiotics used in aquaculture.

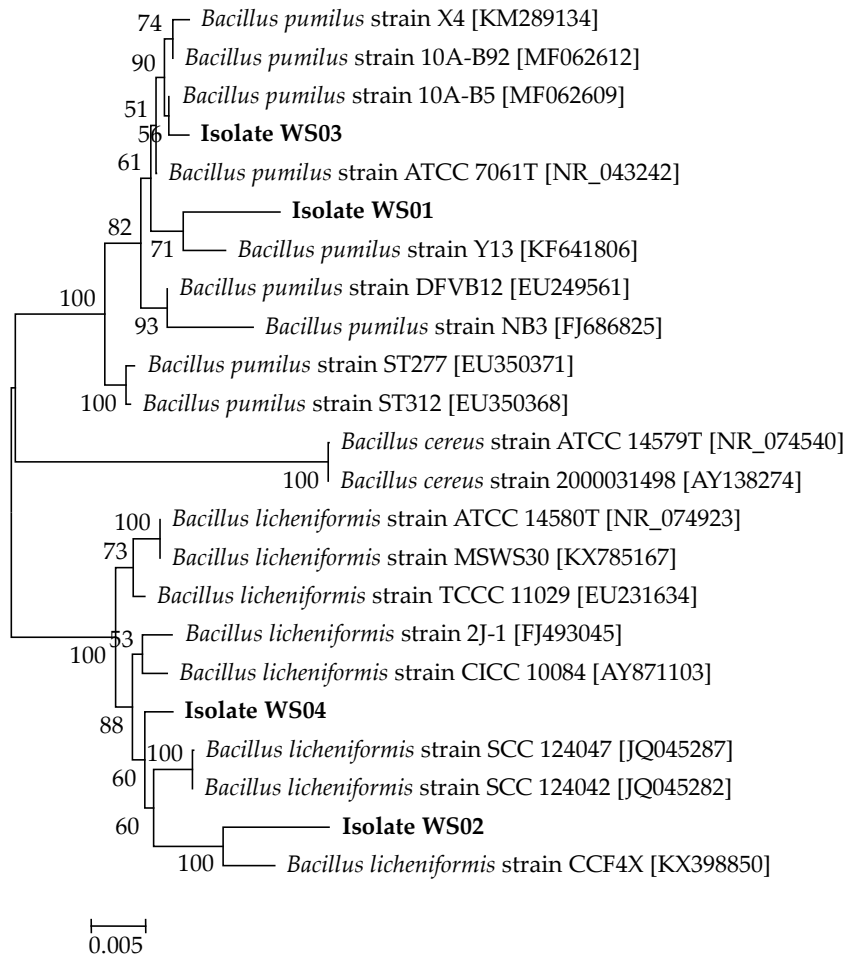

**Figure S1.** The 16S rRNA phylogenetic tree of 19 known bacteria and isolates WS01, WS02, WS03 and WS04 constructed using neighbor-joining method. The length of aligned sequences is 1207 bp. The bootstrap values (%) are shown besides the clades, accession numbers are indicated beside the name of strains, and scale bars represent distance values.
